# Supplementary material
Source: publisher figshare collection journal article supplement (https://rs.figshare.com/ndownloader/files/38988470)
Supplement: Supplementary file 1 [file 38988470]

**Biology Letters**

*Shared stressful experiences affect social proximity in Merino sheep*

Hamideh Keshavarzi, Caroline Lee, Tim R. Dyall, Mark Johnson, andDana L.M. Campbell

Supplementary Figure 1


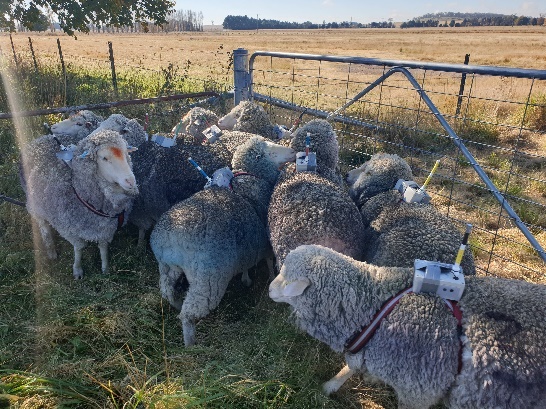


Figure S1: RTK rovers fitted to the backs of experimental sheep.
